# Supplementary material for: Early-Life Supplementation of Bovine Milk Osteopontin Supports Neurodevelopment and Influences Exploratory Behavior
Source: PubMed Central journal article supplement (PMC7469054; doi:10.3390/nu12082206), 2020-07-24
Supplement: nutrients-12-02206-s001.pdf [file nutrients-12-02206-s001.pdf]

**Supplemental Table S1.** Absolute brain volumes (mm<sup>3</sup>)<sup>1</sup>

| Region of Interest            | Diet      |           | Pooled    | P-value |
|-------------------------------|-----------|-----------|-----------|---------|
|                               | Control   | Test      | SEM       |         |
| Whole brain                   | 58,731.55 | 57,175.19 | 1,724.208 | 0.332   |
| Grey matter                   | 36,987.00 | 38,380.00 | 4,188.730 | 0.680   |
| White matter                  | 14,949.00 | 14,912.00 | 720.690   | 0.958   |
| Cerebrospinal fluid           | 4,345.00  | 3,877.63  | 1954.770  | 0.807   |
| Cerebellum                    | 5,950.67  | 5,753.80  | 175.521   | 0.217   |
| Cerebral aqueduct             | 14.15     | 14.12     | 0.426     | 0.953   |
| Corpus callosum               | 227.70    | 232.85    | 7.607     | 0.516   |
| Fourth ventricle              | 17.77     | 16.89     | 0.814     | 0.442   |
| Hypothalamus                  | 85.79     | 84.82     | 2.596     | 0.688   |
| Lateral ventricle             | 318.06    | 326.79    | 10.938    | 0.447   |
| Left caudate                  | 202.82    | 206.80    | 5.526     | 0.603   |
| Left cortex                   | 15,283.54 | 15,473.25 | 341.629   | 0.692   |
| Left hippocampus              | 273.22    | 275.00    | 5.483     | 0.812   |
| Left inferior colliculi       | 66.21     | 64.37     | 1.533     | 0.395   |
| Left internal capsule         | 475.69    | 489.49    | 10.613    | 0.359   |
| Left olfactory bulb           | 1,092.57  | 1,130.78  | 37.270    | 0.478   |
| Left putamen-globus pallidus  | 112.44    | 116.39    | 2.673     | 0.299   |
| Left superior colliculi       | 160.82    | 156.18    | 2.437     | 0.138   |
| Medulla                       | 1,417.80  | 1,397.01  | 37.308    | 0.678   |
| Midbrain                      | 1,982.71  | 1,935.40  | 31.066    | 0.279   |
| Pons                          | 1,193.80  | 1,164.04  | 30.049    | 0.483   |
| Right caudate                 | 211.88    | 217.71    | 10.438    | 0.495   |
| Right cortex                  | 15,222.65 | 15,376.15 | 449.515   | 0.717   |
| Right hippocampus             | 284.84    | 294.81    | 8.860     | 0.345   |
| Right inferior colliculi      | 67.29     | 65.60     | 1.421     | 0.400   |
| Right internal capsule        | 460.57    | 480.61    | 17.214    | 0.151   |
| Right olfactory bulb          | 1,025.94  | 1,117.49  | 57.566    | 0.223   |
| Right putamen-globus pallidus | 106.63    | 109.96    | 4.271     | 0.279   |
| Right superior colliculi      | 166.02    | 163.80    | 3.901     | 0.592   |
| Thalamus                      | 1,070.19  | 1,068.49  | 30.356    | 0.948   |
| Third ventricle               | 19.45     | 19.20     | 0.676     | 0.798   |

<sup>1</sup>Pigs received diets containing 0 (Control) or 250 (Test) mg of bovine milk OPN per L of mixed milk replacer during a 30-d feeding study (n = 11 male pigs for control group and 10 male pigs for test group). Abbreviation: OPN, osteopontin; SEM, standard error of mean.

**Supplemental Table S2.** Axial diffusivity (AD;  $\times 10^{-3}/\text{mm}^2/\text{s}$ )<sup>1</sup>

| Region of Interest     | Diet    |      | Pooled SEM | P-value |
|------------------------|---------|------|------------|---------|
|                        | Control | Test |            |         |
| Corpus callosum        | 0.86    | 0.83 | 0.010      | 0.086   |
| Cerebellum             | 0.65    | 0.62 | 0.010      | 0.119   |
| Left caudate           | 0.88    | 0.85 | 0.024      | 0.217   |
| Left hippocampus       | 0.88    | 0.86 | 0.036      | 0.283   |
| Left internal capsule  | 0.83    | 0.83 | 0.018      | 0.883   |
| Right caudate          | 0.85    | 0.86 | 0.017      | 0.785   |
| Right hippocampus      | 0.87    | 0.85 | 0.017      | 0.524   |
| Right internal capsule | 0.84    | 0.82 | 0.012      | 0.225   |
| Left side              | 0.77    | 0.76 | 0.006      | 0.169   |
| Right side             | 0.76    | 0.76 | 0.007      | 0.966   |
| Thalamus               | 0.76    | 0.75 | 0.007      | 0.125   |
| T1 white matter        | 0.77    | 0.77 | 0.006      | 0.458   |
| Average AD mask        | 0.74    | 0.74 | 0.011      | 0.579   |

<sup>1</sup>Pigs received diets containing 0 (Control) or 250 (Test) mg of bovine milk OPN per L of mixed milk replacer during a 30-d feeding study (n = 11 male pigs for control group and 10 male pigs for test group). Data presented are least square means and P-values from mixed model ANOVA. Abbreviation: OPN, osteopontin; SEM, standard error of mean.

**Supplemental Table S3.** Mean diffusivity (MD;  $\times 10^{-3}/\text{mm}^2/\text{s}$ )<sup>1</sup>

| Region of Interest     | Diet    |      | Pooled SEM | P-value |
|------------------------|---------|------|------------|---------|
|                        | Control | Test |            |         |
| Corpus callosum        | 0.62    | 0.63 | 0.025      | 0.126   |
| Cerebellum             | 0.51    | 0.50 | 0.006      | 0.245   |
| Left caudate           | 0.65    | 0.64 | 0.023      | 0.233   |
| Left hippocampus       | 0.63    | 0.62 | 0.016      | 0.341   |
| Left internal capsule  | 0.49    | 0.48 | 0.009      | 0.441   |
| Right caudate          | 0.65    | 0.65 | 0.011      | 0.863   |
| Right hippocampus      | 0.62    | 0.61 | 0.012      | 0.674   |
| Right internal capsule | 0.49    | 0.49 | 0.010      | 0.862   |
| Left side              | 0.55    | 0.54 | 0.004      | 0.132   |
| Right side             | 0.54    | 0.54 | 0.005      | 0.904   |
| Thalamus               | 0.58    | 0.57 | 0.005      | 0.068   |
| T1 white matter        | 0.55    | 0.54 | 0.004      | 0.407   |
| Average MD mask        | 0.55    | 0.55 | 0.008      | 0.538   |

<sup>1</sup>Pigs received diets containing 0 (Control) or 250 (Test) mg of bovine milk OPN per L of mixed milk replacer during a 30-d feeding study (n = 11 male pigs for control group and 10 male pigs for test group). Data presented are least square means and P-values from mixed model ANOVA. Abbreviation: OPN, osteopontin; SEM, standard error of mean.

**Supplemental Table S4.** Radial diffusivity (RD;  $\times 10^{-3}/\text{mm}^2/\text{s}$ )<sup>1</sup>

| Region of Interest     | Diet    |      | Pooled |              |
|------------------------|---------|------|--------|--------------|
|                        | Control | Test | SEM    | P-Value      |
| Corpus callosum        | 0.50    | 0.53 | 0.038  | <b>0.008</b> |
| Cerebellum             | 0.44    | 0.44 | 0.005  | 0.293        |
| Left caudate           | 0.54    | 0.53 | 0.024  | 0.479        |
| Left hippocampus       | 0.51    | 0.50 | 0.010  | 0.552        |
| Left internal capsule  | 0.32    | 0.32 | 0.014  | 0.797        |
| Right caudate          | 0.55    | 0.55 | 0.011  | 0.946        |
| Right hippocampus      | 0.51    | 0.49 | 0.008  | 0.236        |
| Right internal capsule | 0.32    | 0.32 | 0.017  | 0.818        |
| Left side              | 0.44    | 0.43 | 0.004  | 0.128        |
| Right side             | 0.43    | 0.43 | 0.003  | 0.250        |
| Thalamus               | 0.48    | 0.48 | 0.006  | 0.323        |
| T1 white matter        | 0.43    | 0.43 | 0.004  | 0.430        |
| Average RD mask        | 0.45    | 0.45 | 0.007  | 0.503        |

<sup>1</sup>Pigs received diets containing 0 (Control) or 250 (Test) mg of bovine milk OPN per L of mixed milk replacer during a 30-d feeding study (n = 11 male pigs for control group and 10 male pigs for test group). Data presented are least square means and P-values from mixed model ANOVA. Abbreviation: OPN, osteopontin; SEM, standard error of mean.
